**Title:** Evaluation of rapid antibody test and chest computed tomography results of COVID-19 patients: A retrospective study

Ali Ozturk<sup>1</sup>, Taylan Bozok<sup>2</sup>, Tugce Simsek Bozok<sup>3</sup>

<sup>1</sup>Department of Medical Microbiology, Nigde Omer Halisdemir University Faculty of Medicine, Nigde, Turkey

<sup>2</sup>Department of Medical Microbiology, Nigde Omer Halisdemir University Training and Research Hospital, Nigde, Turkey

<sup>3</sup>Department of Infectious Diseases and Clinical Microbiology, Nigde Omer Halisdemir University Training and Research Hospital, Nigde, Turkey

The authors have withdrawn this manuscript because some results have statistical mistakes. Therefore, the authors do not wish this work to be cited as a reference for the project.
